# Supplementary material for: HER2 Positivity in Histological Subtypes of Salivary Gland Carcinoma: A Systematic Review and Meta-Analysis
Source: PubMed Central journal article supplement (PMC8264509; doi:10.3389/fonc.2021.693394), 2021-06-24
Supplement: DataSheet_1.pdf [file DataSheet_1.pdf]

# **HER2 positivity in histological subtypes of salivary gland carcinoma: A systematic review and meta-analysis**

Kristian Egebjerg MD<sup>1</sup>, Cecilie Dupont Harwood MD<sup>2</sup>, Nina Claire Woller<sup>3</sup> MD, Claus Andrup

Kristensen MD, PhD<sup>1</sup>, Morten Mau-Sørensen MD, Ph.D.<sup>1</sup>

<sup>1</sup>Department of Oncology; Copenhagen University Hospital, Rigshospitalet, Copenhagen, Denmark.

<sup>2</sup>Department of Otorhinolaryngology, Head & Neck Surgery and Audiology, Copenhagen, Denmark.

<sup>3</sup>Department of Pathology; Copenhagen University Hospital, Rigshospitalet, Copenhagen, Denmark.

## **Supplemental Data**

## S1: Overview of included studies and which data was included in meta-analysis

| First Author | Year | Continent          | Collection | HER2 Criteria        | Probe IHC   | ISH_type | Probe ISH  | S D C | A D C | C EP | AD CC | A CC | Ba sal | Clea rC | E pi | Poo rly | Po ly | Muc oep | My oep | Onco cyt | Clea rC | SC C | Ly mfo | Intra duct | SDC IHC | SDC ISH |
|--------------|------|--------------------|------------|----------------------|-------------|----------|------------|-------|-------|------|-------|------|--------|---------|------|---------|-------|---------|--------|----------|---------|------|--------|------------|---------|---------|
| Khan         | 2001 | America            | Archival   | IHC3                 | Novacastria | N/A      | N/A        | -     | -     | -    | Yes   | -    | -      | -       | -    | -       | -     | -       | -      | -        | -       | -    | -      | -          | -       | -       |
| Skálová      | 2001 | Europe             | Archival   | IHC2 or IHC3         | DAKO        | N/A      | N/A        | Yes   | Yes   | Yes  | Yes   | Yes  | Yes    | -       | -    | Yes     | -     | Yes     | Yes    | -        | -       | -    | -      | -          | -       | -       |
| Dori         | 2002 | Asia               | Archival   | IHC3                 | DAKO        | N/A      | N/A        | -     | -     | -    | Yes   | -    | -      | -       | -    | -       | -     | -       | -      | -        | -       | -    | -      | -          | -       | -       |
| Skalova      | 2003 | Europe             | Archival   | IHC2 and ISH or IHC3 | DAKO        | FISH     | Ventana    | Yes   | -     | -    | -     | -    | -      | -       | -    | -       | -     | -       | -      | -        | -       | -    | -      | -          | Yes     | Yes     |
| Glisson      | 2004 | America            | Archival   | IHC2 or IHC3         | DAKO        | N/A      | N/A        | Yes   | Yes   | Yes  | Yes   | Yes  | -      | -       | -    | -       | -     | Yes     | Yes    | -        | -       | Yes  | -      | Yes        | -       | -       |
| Weed         | 2004 | America            | Archival   | IHC2 or IHC3         | DAKO        | N/A      | N/A        | -     | -     | -    | -     | -    | -      | -       | -    | -       | -     | Yes     | -      | -        | -       | -    | -      | -          | -       | -       |
| Di Palma     | 2005 | Europe             | Archival   | IHC3                 | Neomarkers  | FISH     | PathVysion | -     | -     | Yes  | -     | -    | -      | -       | -    | -       | -     | -       | -      | -        | -       | -    | -      | -          | -       | -       |
| Jaehne       | 2005 | Europe             | Archival   | IHC3                 | DAKO        | N/A      | N/A        | Yes   | -     | -    | -     | -    | -      | -       | -    | -       | -     | -       | -      | -        | -       | -    | -      | -          | Yes     | -       |
| Cornolti     | 2007 | Europe             | Archival   | IHC3 or ISH          | DAKO        | FISH     | PathVysion | Yes   | -     | -    | -     | -    | -      | -       | -    | -       | -     | -       | -      | -        | -       | -    | -      | -          | Yes     | Yes     |
| Nabili       | 2007 | America            | Archival   | IHC3                 | DAKO        | FISH     | PathVysion | Yes   | -     | -    | -     | -    | -      | -       | -    | -       | -     | -       | -      | -        | -       | -    | -      | -          | -       | Yes     |
| Tapia        | 2007 | Europe             | Na         | IHC2 and ISH or IHC3 | DAKO        | FISH     | PathVysion | -     | Yes   | -    | -     | Yes  | -      | -       | -    | -       | -     | Yes     | -      | -        | -       | Yes  | -      | -          | -       | -       |
| Williams     | 2007 | America            | Archival   | IHC3                 | Neomarkers  | N/A      | N/A        | Yes   | -     | -    | -     | -    | -      | -       | -    | -       | -     | -       | -      | -        | -       | -    | -      | -          | Yes     | -       |
| Ettl         | 2008 | Europe             | Archival   | IHC2 or IHC3         | DAKO        | N/A      | N/A        | Yes   | Yes   | Yes  | Yes   | Yes  | Yes    | -       | -    | -       | -     | Yes     | -      | Yes      | -       | Yes  | Yes    | -          | -       | -       |
| Shang        | 2008 | Asia               | Archival   | IHC2 or IHC3         | DAKO        | N/A      | N/A        | -     | -     | -    | -     | -    | -      | -       | -    | -       | -     | Yes     | -      | -        | -       | -    | -      | -          | -       | -       |
| Locati       | 2009 | Europe             | Archival   | IHC2 and ISH or IHC3 | DAKO        | N/A      | PathVysion | Yes   | Yes   | -    | Yes   | -    | -      | -       | -    | Yes     | -     | Yes     | Yes    | -        | -       | -    | -      | -          | -       | Yes     |
| Luukka       | 2010 | Finland and Canada | Archival   | ISH                  | Ventana     | SISH     | Ventana    | -     | -     | -    | -     | -    | -      | -       | -    | -       | -     | Yes     | -      | -        | -       | -    | -      | -          | -       | -       |
| Williams     | 2010 | America            | Archival   | IHC2 and ISH or IHC3 | Labvision   | FISH     | PathVysion | Yes   | -     | -    | -     | -    | -      | -       | -    | -       | -     | -       | -      | -        | -       | -    | -      | -          | Yes     | Yes     |
| Clauditz     | 2011 | Europe             | Archival   | IHC3 or ISH          | DAKO        | FISH     | PathVysion | Yes   | Yes   | -    | Yes   | Yes  | Yes    | -       | Yes  | -       | Yes   | Yes     | Yes    | Yes      | -       | -    | -      | -          | Yes     | Yes     |
| Di Palma     | 2012 | Europe             | Archival   | IHC2 and ISH or IHC3 | DAKO        | SISH     | Ventana    | Yes   | -     | -    | -     | -    | -      | -       | -    | -       | -     | -       | -      | -        | -       | -    | -      | -          | Yes     | Yes     |





## **S2: Search syntax**

Searched up to 19<sup>th</sup> September 2020

### **PUBMED:**

((salivary gland tumor[Title/Abstract] OR carcinoma of the salivary gland[Title/Abstract] OR salivary gland cancer[Title/Abstract])) AND (HER2 or c-ERB2)

Results: 37 hits

### **Web of science:**

AB=(salivary gland tumor OR carcinoma of the salivary gland OR salivary gland cancer)

AND AB=(HER2 OR c-erbB2)

Results: 100 hits

### **EMBASE:**

((salivary gland tumor or carcinoma of the salivary gland or salivary gland cancer).ab and HER2.af) or c-ERB2 af.

Results: 95 hits

### **S3: Full list of texts screened but not included (n=74)**

| <b>First Author</b> | <b>Year</b> | <b>PMID</b> | <b>Reason for exclusion</b>                              |
|---------------------|-------------|-------------|----------------------------------------------------------|
| Yamada              | 1989        | 2508310     | No HER2 data                                             |
| Kernohan            | 1991        | 1672154     | No quantitative SGC HER2 IHC or ISH data                 |
| Shrestha            | 1992        | 1361005     | No quantitative SGC HER2 IHC or ISH data                 |
| Sugano              | 1992        | 1353853     | “Unique” scoring system of HER2 IHC                      |
| Delgado             | 1993        | 7688652     | No quantitative SGC HER2 IHC or ISH data                 |
| Hellquist           | 1994        | 7931825     | No quantitative SGC HER2 IHC or ISH data                 |
| Kärjä               | 1994        | 7915830     | No quantitative SGC HER2 IHC or ISH data                 |
| Müller              | 1994        | 7991521     | No quantitative SGC HER2 IHC or ISH data                 |
| Press               | 1994        | 7522962     | No quantitative SGC HER2 IHC or ISH data                 |
| Cho                 | 1995        | 7726139     | No quantitative SGC HER2 IHC or ISH data                 |
| Giannoni            | 1995        | 7870438     | No quantitative SGC HER2 IHC or ISH data                 |
| Shintani            | 1995        | 8669836     | No quantitative SGC HER2 IHC or ISH data                 |
| Felix               | 1996        | 8666365     | No quantitative SGC HER2 IHC or ISH data                 |
| Kamio               | 1996        | 8925128     | No quantitative SGC HER2 IHC or ISH data                 |
| Rosa                | 1996        | 8729044     | No quantitative SGC HER2 IHC or ISH data                 |
| Cho                 | 1997        | 9443087     | Case report and no quantitative SGC HER2 IHC or ISH data |

|                   |      |          |                                                             |
|-------------------|------|----------|-------------------------------------------------------------|
| Martinez-Barba    | 1997 | 8625227  | (Listed as review) No quantitative SGC HER2 IHC or ISH data |
| Suzuki            | 1998 | 10211217 | No quantitative SGC HER2 IHC or ISH data                    |
| Wick              | 1998 | 9426521  | No quantitative SGC HER2 IHC or ISH data                    |
| Cho               | 1999 | 10402521 | No quantitative SGC HER2 IHC or ISH data                    |
| Jaehne            | 2001 | 11555785 | Article in German                                           |
| Gibbons           | 2001 | 11568571 | No quantitative SGC HER2 IHC or ISH data                    |
| Lewis             | 2001 | 11431714 | No quantitative SGC HER2 IHC or ISH data                    |
| O'Malley          | 2001 | 11293897 | Study on breast cancer, no SGC HER2 IHC or ISH data         |
| Haddad            | 2003 | 12907212 | Preselected patient population                              |
| Nguyen            | 2003 | 14974865 | Not accessible                                              |
| Nagler            | 2003 | 12759537 | No prevalence data                                          |
| Etges             | 2003 | 14645349 | No quantitative SGC HER2 IHC or ISH data                    |
| Simpson           | 2003 | 12883239 | Case report                                                 |
| Brandwein-Gensler | 2004 | 15252310 | Case report and no definition of HER2                       |
| Dagrada           | 2004 | 14987238 | Article is a case report / "comment"                        |
| Nagao             | 2004 | 15323139 | Case report                                                 |
| Freitas           | 2005 | 16273189 | No quantitative SGC HER2 IHC or ISH data                    |

|              |      |          |                                                                |
|--------------|------|----------|----------------------------------------------------------------|
| Locati       | 2005 | 7991521  | Article is a “Comment”                                         |
| Laurie       | 2006 | 16763282 | Review                                                         |
| Sørensen     | 2006 | 16630292 | No data on HER2                                                |
| Agulnik      | 2007 | 17761983 | Study on pre-selected population                               |
| Ihrler       | 2007 | 17593217 | No data on HER2                                                |
| Matsubayashi | 2007 | 17310348 | No quantitative IHC or ISH HER2 data                           |
| Sasaki       | 2007 | 17192791 | No data on HER2 status in SGC                                  |
| Johnson      | 2008 | 18091319 | Not accessible                                                 |
| Ettl         | 2008 | 18214402 | Article in German                                              |
| Nashed       | 2009 | 18405406 | Case report                                                    |
| Vidal        | 2009 | 19309723 | Study on pre-selected population                               |
| Lujan        | 2010 | 20664595 | No HER2 data                                                   |
| Hashimoto    | 2011 | 21317706 | Data already included in Hashimoto 2012                        |
| Santini      | 2012 | 24006824 | Article in French                                              |
| Ettl         | 2012 | 22240798 | No discrimination between histological subtype and HER2 status |
| Golusinski   | 2013 | 24021827 | Article in Polish                                              |
| Jayaprakash  | 2014 | 23606370 | No HER2 data                                                   |



|              |      |          |                                                                |
|--------------|------|----------|----------------------------------------------------------------|
| Limaye       | 2013 | 23429737 | Study on pre-selected population                               |
| Ettl         | 2013 | 23780687 | No discrimination between histological subtype and HER2 status |
| Kuo          | 2013 | 23821212 | Review                                                         |
| Otsuka       | 2013 | 24191589 | Article in Japanese                                            |
| Perissinotti | 2013 | 23749912 | Study on pre-selected population                               |
| Simpson      | 2013 | 23821208 | Review                                                         |
| Stenman      | 2013 | 23821214 | Review                                                         |
| Yamamoto     | 2014 | 25087467 | Case Report                                                    |
| Grünewald    | 2015 | 26053092 | No IHC or ISH HER2 data                                        |
| Huo          | 2015 | 26575266 | No SGC data                                                    |
| Masubuchi    | 2015 | 24553861 | Does not discriminate between SGC subtypes                     |
| Dalin        | 2016 | 27103403 | No extractable HER2 IHC data                                   |
| Gilbert      | 2016 | 26939990 | Study not clear HER2 positivity criteria                       |
| Wang         | 2016 | 27334835 | No quantitative SGC HER2 IHC or ISH data                       |
| Krings       | 2017 | 28548128 | HER2 status not performed                                      |
| Schmitt      | 2017 | 29103750 | Review                                                         |
| Shams        | 2018 | N/A      | Article not accessible                                         |
| Takahashi    | 2018 | 30452336 | Study on pre-selected population                               |

|           |      |          |                                                                |
|-----------|------|----------|----------------------------------------------------------------|
| Kurzrock  | 2019 | 32067683 | Study on pre-selected population                               |
| Stodulski | 2019 | 31062093 | No definition of HER2 positivity                               |
| Hanna     | 2020 | 32310325 | No discrimination between histological subtype and HER2 status |

## S4: Salivary Duct Carcinoma overall and IHC assay subgroup analysis

| <b>Salivary duct carcinoma: Overall</b>                               |                          |                            |                  |
|-----------------------------------------------------------------------|--------------------------|----------------------------|------------------|
| <b>Assay</b>                                                          | <b>Number of studies</b> | <b>Prevalence Estimate</b> | <b>95% CI</b>    |
| DAKO                                                                  | 19                       | 46.4340                    | 31.7966; 61.7127 |
| Labvision                                                             | 1                        | 15.1515                    | 8.3507; 25.9243  |
| Neomarkers                                                            | 1                        | 27.1186                    | 17.3278; 39.7797 |
| No IHC done                                                           | 1                        | 42.1053                    | 22.6327; 64.3884 |
| Roche                                                                 | 3                        | 46.1538                    | 20.5701; 73.9378 |
| Unknown                                                               | 1                        | 39.2857                    | 23.2592; 58.0079 |
| Ventana                                                               | 11                       | 44.1469                    | 35.6145; 53.0397 |
| Test for subgroup differences (random effects model): p-value: 0.0017 |                          |                            |                  |

| <b>Salivary Duct Carcinoma: IHC 0</b>                                  |                          |                            |                  |
|------------------------------------------------------------------------|--------------------------|----------------------------|------------------|
| <b>Assay</b>                                                           | <b>Number of studies</b> | <b>Prevalence Estimate</b> | <b>95% CI</b>    |
| Ventana                                                                | 8                        | 25.1282                    | 18.5098; 33.1504 |
| DAKO                                                                   | 8                        | 32.6954                    | 11.0481; 65.5170 |
| Neomarkers                                                             | 1                        | 26.1905                    | 17.9097; 36.5933 |
| Labvision                                                              | 1                        | 74.2424                    | 62.4083; 83.3453 |
| Test for subgroup differences (random effects model): p-value < 0.0001 |                          |                            |                  |

| <b>Salivary Duct Carcinoma: IHC 1+</b>                               |                          |                            |                  |
|----------------------------------------------------------------------|--------------------------|----------------------------|------------------|
| <b>Assay</b>                                                         | <b>Number of studies</b> | <b>Prevalence Estimate</b> | <b>95% CI</b>    |
| Ventana                                                              | 8                        | 14.0028                    | 7.5018; 24.6370  |
| DAKO                                                                 | 8                        | 5.4824                     | 1.6132; 17.0252  |
| Neomarkers                                                           | 1                        | 19.0476                    | 12.0097; 28.8573 |
| Labvision                                                            | 1                        | 6.0606                     | 2.2934; 15.0620  |
| Test for subgroup differences (random effects model): p-value 0.0361 |                          |                            |                  |

| <b>Salivary Duct Carcinoma: IHC2+</b>                                |                          |                            |                  |
|----------------------------------------------------------------------|--------------------------|----------------------------|------------------|
| <b>Assay</b>                                                         | <b>Number of studies</b> | <b>Prevalence Estimate</b> | <b>95% CI</b>    |
| Ventana                                                              | 8                        | 18.9744                    | 13.1982; 26.5064 |
| DAKO                                                                 | 8                        | 7.7966                     | 1.9964; 25.9814  |
| Neomarkers                                                           | 1                        | 29.7619                    | 20.9757; 40.3492 |
| Labvision                                                            | 1                        | 4.5455                     | 1.4734; 13.1666  |
| Test for subgroup differences (random effects model): p-value 0.0011 |                          |                            |                  |

| <b>Salivary Duct Carcinoma: IHC3+</b>                                |                          |                            |                  |
|----------------------------------------------------------------------|--------------------------|----------------------------|------------------|
| <b>Assay</b>                                                         | <b>Number of studies</b> | <b>Prevalence Estimate</b> | <b>95% CI</b>    |
| Ventana                                                              | 8                        | 40.5947                    | 30.8457; 51.1461 |
| DAKO                                                                 | 8                        | 41.4235                    | 21.1502; 65.0884 |
| Neomarkers                                                           | 1                        | 25.0000                    | 16.9036; 35.3258 |
| Labvision                                                            | 1                        | 15.1515                    | 8.3507; 25.9243  |
| Test for subgroup differences (random effects model): p-value 0.0017 |                          |                            |                  |

## S5: Tissue types with low number of observations.

### Squamous Cell Carcinoma

| Study          | HER2 definition      | Events | Total | HER2 Positivity (%) | Events | 95%-CI         |
|----------------|----------------------|--------|-------|---------------------|--------|----------------|
| Tapia 2007     | IHC2 and ISH or IHC3 | 0      | 2     |                     | 0.00   | [0.00; 65.76]  |
| Glisson 2004   | IHC2 or IHC3         | 3      | 5     |                     | 60.00  | [23.07; 88.24] |
| Hashimoto 2017 | IHC2 and ISH or IHC3 | 1      | 5     |                     | 20.00  | [3.62; 62.45]  |
| Ettl 2008      | IHC2 or IHC3         | 2      | 5     |                     | 40.00  | [11.76; 76.93] |
| Ettl 2012      | IHC3                 | 1      | 22    |                     | 4.55   | [0.81; 21.80]  |

### Epithelial-myoepithelial carcinoma

| Study          | HER2 definition      | Events | Total | HER2 Positivity (%) | Events | 95%-CI        |
|----------------|----------------------|--------|-------|---------------------|--------|---------------|
| Hashimoto 2017 | IHC2 and ISH or IHC3 | 0      | 5     |                     | 0.00   | [0.00; 43.45] |
| Clauditz 2011  | IHC3 or ISH          | 1      | 51    |                     | 1.96   | [0.35; 10.30] |

### Poorly differentiated carcinoma

| Study          | HER2 definition      | Events | Total | HER2 Positivity (%) | Events | 95%-CI        |
|----------------|----------------------|--------|-------|---------------------|--------|---------------|
| Locati 2015    | IHC2 and ISH or IHC3 | 0      | 1     |                     | 0.00   | [0.00; 79.35] |
| Skálová 2001   | IHC2 or IHC3         | 0      | 3     |                     | 0.00   | [0.00; 56.15] |
| Locati 2009    | IHC2 and ISH or IHC3 | 1      | 4     |                     | 25.00  | [4.56; 69.94] |
| Hashimoto 2017 | IHC2 and ISH or IHC3 | 0      | 7     |                     | 0.00   | [0.00; 35.43] |

### Polymorphus adenocarcinoma

| Study          | HER2 definition      | Events | Total | HER2 Positivity (%) | Events | 95%-CI        |
|----------------|----------------------|--------|-------|---------------------|--------|---------------|
| Hashimoto 2017 | IHC2 and ISH or IHC3 | 0      | 3     |                     | 0.00   | [0.00; 56.15] |
| Ettl 2012      | IHC3                 | 0      | 11    |                     | 0.00   | [0.00; 25.88] |
| Clauditz 2011  | IHC3 or ISH          | 0      | 36    |                     | 0.00   | [0.00; 9.64]  |

### Basal Cell Carcinoma

| Study          | HER2 definition      | Events | Total | HER2 Positivity (%) | Events | 95%-CI        |
|----------------|----------------------|--------|-------|---------------------|--------|---------------|
| Skálová 2001   | IHC2 or IHC3         | 0      | 1     |                     | 0.00   | [0.00; 79.35] |
| Suzuki 2012    | IHC2 or IHC3         | 0      | 2     |                     | 0.00   | [0.00; 65.76] |
| Hashimoto 2017 | IHC2 and ISH or IHC3 | 0      | 3     |                     | 0.00   | [0.00; 56.15] |
| Ettl 2008      | IHC2 or IHC3         | 0      | 3     |                     | 0.00   | [0.00; 56.15] |
| Clauditz 2011  | IHC3 or ISH          | 0      | 24    |                     | 0.00   | [0.00; 13.80] |

### Oncocytic Carcinoma

| Study          | HER2 definition      | Events | Total | HER2 Positivity (%) | Events | 95%-CI        |
|----------------|----------------------|--------|-------|---------------------|--------|---------------|
| Hashimoto 2017 | IHC2 and ISH or IHC3 | 0      | 1     |                     | 0.00   | [0.00; 79.35] |
| Ettl 2008      | IHC2 or IHC3         | 0      | 1     |                     | 0.00   | [0.00; 79.35] |
| Clauditz 2011  | IHC3 or ISH          | 0      | 12    |                     | 0.00   | [0.00; 24.25] |

Hashimoto 2017 reported one patient with clear cell carcinoma with no HER2 positivity defined as IHC2+ and ISH amplification or IHC3+.

Suzuki 2012 and Ettl 2008 reported a total of five patients with lymphoepithelial carcinoma of which zero were HER2 positive.

Hsieh 2020 reported on nine patients of Intraductal Carcinoma in which one was IHC2+.
